# Supplementary material for: Nonwoven-based gelatin/polycaprolactone membrane loaded with ERK inhibitor U0126 for treatment of tendon defects
Source: PubMed Central journal article supplement (PMC8744263; doi:10.1186/s13287-021-02679-x), 2022-01-10

■ Cumulative U0126 release from NBM

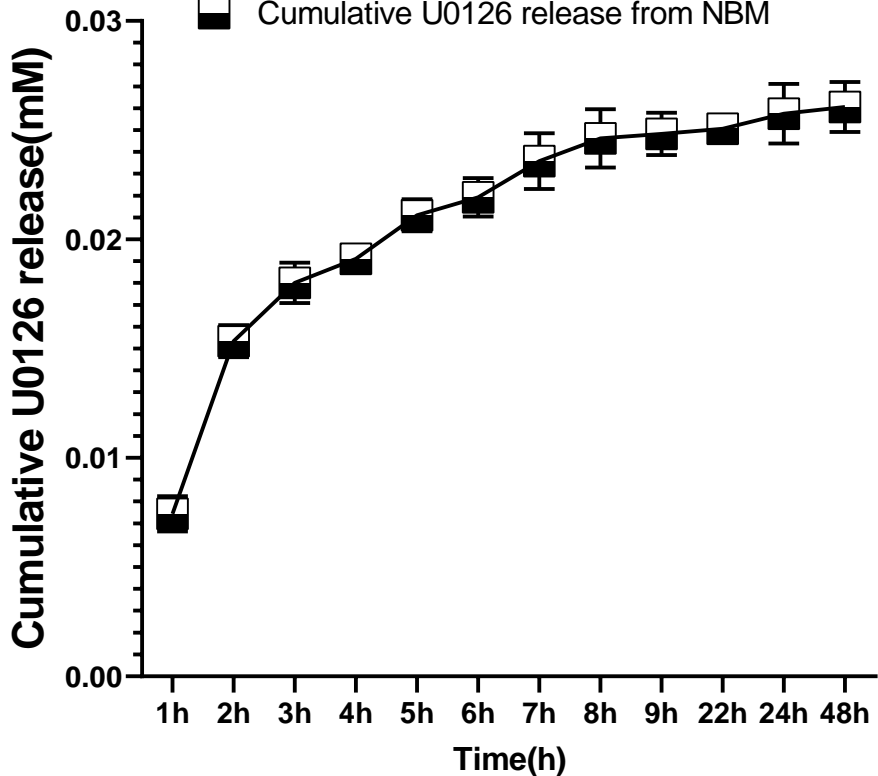

Supplement: 13287_2021_2679_MOESM1_ESM.pdf [file 13287_2021_2679_MOESM1_ESM.pdf]
